# Supplementary material for: A Comparative Study of Mesenchymal Stem Cell-Derived Extracellular Vesicles’ Local and Systemic Dose-Dependent Administration in Rat Spinal Cord Injury
Source: MDPI journal article supplement (doi:10.3390/biology11121853), 2022-12-19
Supplement: s1 [file s1]

# Amplitude Ratio H/M

Table S1

30 day of SCI

## Analysis of Variance Results

| Data Summary   |                          |                           |                            |        |         |
|----------------|--------------------------|---------------------------|----------------------------|--------|---------|
| Groups         | Mean                     | <a href="#">Std. Dev.</a> | <a href="#">Std. Error</a> |        |         |
| Intact         | 0.1667                   | 0.1242                    | 0.0345                     |        |         |
| SCI            | 0.0683                   | 0.0488                    | 0.0135                     |        |         |
| SCI FM         | 0.1327                   | 0.1711                    | 0.0494                     |        |         |
| SCI FM + EVs5  | 0.0899                   | 0.0716                    | 0.0191                     |        |         |
| SCI FM + EVs10 | 0.124                    | 0.1293                    | 0.0373                     |        |         |
| SCI EVs10      | 0.1514                   | 0.1448                    | 0.0436                     |        |         |
| SCI EVs50      | 0.1508                   | 0.1402                    | 0.0467                     |        |         |
| ANOVA Summary  |                          |                           |                            |        |         |
| Source         | Degrees of Freedom<br>DF | Sum of Squares<br>SS      | Mean Square<br>MS          | F-Stat | P-Value |
| Between Groups | 6                        | 0.0959                    | 0.016                      | 1.0677 | 0.3892  |
| Within Groups  | 77                       | 1.1532                    | 0.015                      |        |         |
| Total:         | 83                       | 1.2491                    |                            |        |         |

no difference between the groups at day 30 and the control group

Table S2

60 day of SCI

## Analysis of Variance Results

| Data Summary |        |                           |                            |
|--------------|--------|---------------------------|----------------------------|
| Groups       | Mean   | <a href="#">Std. Dev.</a> | <a href="#">Std. Error</a> |
| Intact       | 0.1667 | 0.1242                    | 0.0345                     |

|                |        |        |        |
|----------------|--------|--------|--------|
| SCI            | 0.1284 | 0.0779 | 0.0189 |
| SCI FM         | 0.1427 | 0.1683 | 0.0508 |
| SCI FM + EVs5  | 0.1177 | 0.0675 | 0.0151 |
| SCI FM + EVs10 | 0.1499 | 0.0705 | 0.0212 |
| SCI EVs10      | 0.1007 | 0.0914 | 0.0244 |
| SCI EVs50      | 0.0778 | 0.0687 | 0.0184 |

| ANOVA Summary         |                          |                      |                   |        |         |
|-----------------------|--------------------------|----------------------|-------------------|--------|---------|
| Source                | Degrees of Freedom<br>DF | Sum of Squares<br>SS | Mean Square<br>MS | F-Stat | P-Value |
| <b>Between Groups</b> | 6                        | 0.0735               | 0.0123            | 1.3075 | 0.2616  |
| <b>Within Groups</b>  | 93                       | 0.8717               | 0.0094            |        |         |
| <b>Total:</b>         | 99                       | 0.9452               |                   |        |         |

no difference between the groups at day 60 and the control group
